# Supplementary material
Source: MDPI journal article supplement (https://www.mdpi.com/2075-163X/12/3/362)
Supplement: s1 [file s1]

## Supplementary Materials

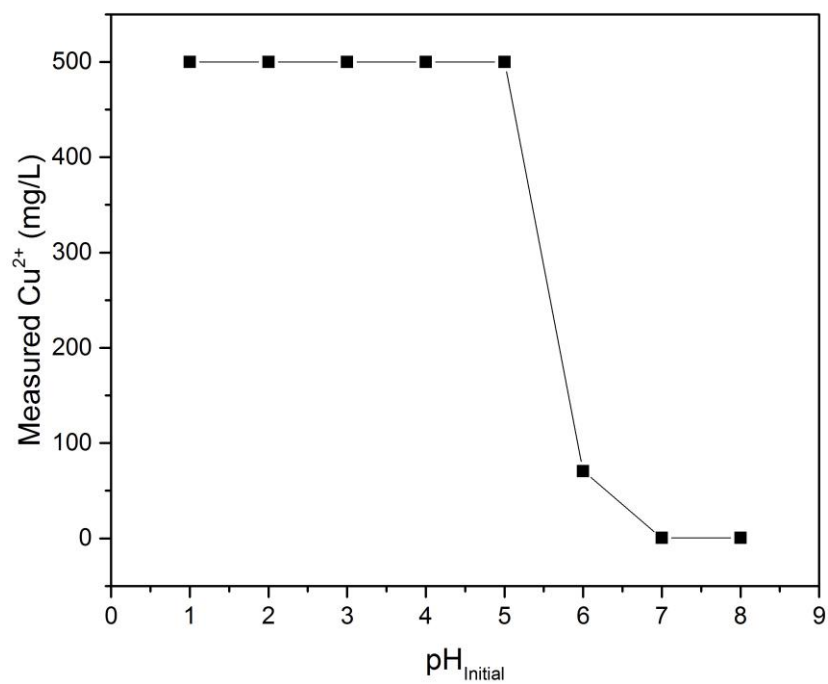

Figure. S1. Effect of solution pH on the measured concentration of  $\text{Cu}^{2+}$  (Target  $\text{Cu}^{2+}$  concentration: 500 mg/L).

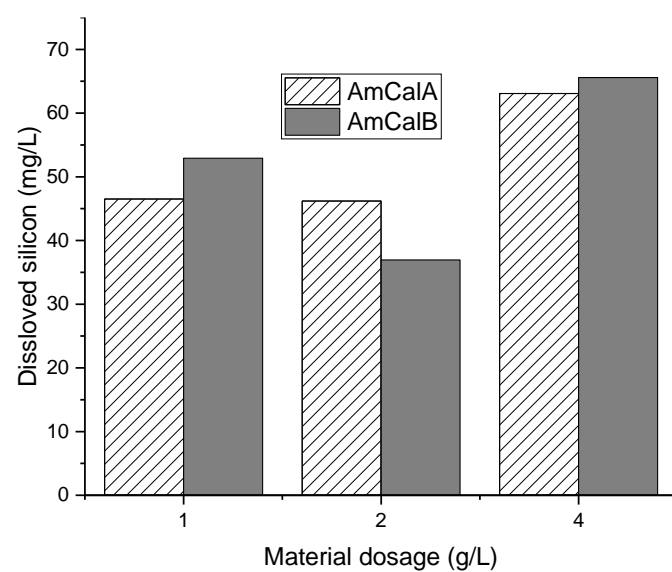

Figure S2: Effect of material dosage on the dissolved silicon (Initial pH:5, initial Cu<sup>2+</sup> concentration: 700 mg/L, reaction duration: 20 h)

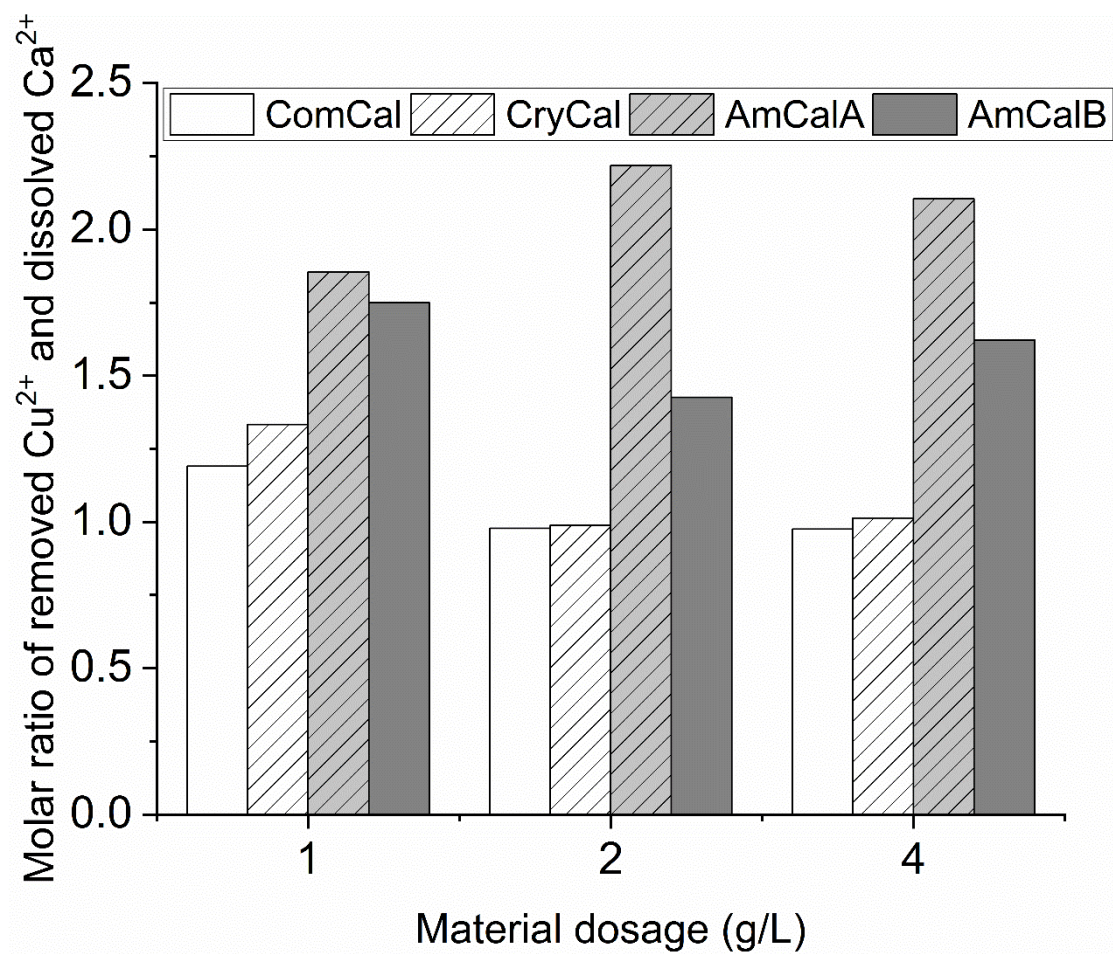

Figure S3: Molar ratio of removed  $\text{Cu}^{2+}$  and dissolved  $\text{Ca}^{2+}$  with different material dosages.
